# Supplementary material for: Effect of tolvaptan on renal water and sodium excretion and blood pressure during nitric oxide inhibition: a dose-response study in healthy subjects
Source: Springer Nature journal article supplement (doi:10.1186/s12882-017-0501-1), 2017-03-13
Supplement: MOESM1 [file 12138872]

|                                 | Before each examination day |                    |                    |                    | p (ANOVA) |
|---------------------------------|-----------------------------|--------------------|--------------------|--------------------|-----------|
|                                 | Placebo                     | Tolvaptan<br>15 mg | Tolvaptan<br>30 mg | Tolvaptan<br>45 mg |           |
| <b>Urine Output (ml/24 h)</b>   | 2219 ± 750                  | 2195 ± 485         | 2360 ± 684         | 2300 ± 543         | 0.88      |
| <b>C<sub>H2O</sub> (ml/min)</b> | -0.22± 0.58                 | -0.22± 0.51        | -0.14± 0.50        | -0.24± 0.53        | 0.99      |
| <b>u-AQP2 (ng/min)</b>          | 0.93± 0.16                  | 0.91± 0.12         | 0.96± 0.20         | 0.95± 0.18         | 0.66      |
| <b>u-Na (mmol/24 h)</b>         | 102± 47                     | 100± 36            | 101±35             | 103±36             | 0.90      |
| <b>u-K (mmol/24h)</b>           | 52± 15                      | 52± 12             | 46±13              | 53±17              | 0.74      |
