# Supplementary material for: Effect of tolvaptan on renal water and sodium excretion and blood pressure during nitric oxide inhibition: a dose-response study in healthy subjects
Source: Springer Nature journal article supplement (doi:10.1186/s12882-017-0501-1), 2017-03-13
Supplement: MOESM2 [file 12138872]

| Periods                  | Baseline | L-NMMA     |             |             | Post infusion |          | P<br>(GLM-within) |
|--------------------------|----------|------------|-------------|-------------|---------------|----------|-------------------|
|                          | 0-90 min | 90-120 min | 120-150 min | 150-180 min | 180-210 min   |          |                   |
| <b>p-sodium (mmol/l)</b> |          |            |             |             |               |          |                   |
| Placebo                  | 139± 1   | 139± 2     | 138± 2      | 138± 2      | 138± 2        | < 0.0001 |                   |
| Tolvaptan 15 mg          | 141± 1   | 141± 1     | 140 ± 1     | 141± 1      | 141± 2        |          |                   |
| Tolvaptan 30 mg          | 141± 2   | 142± 2     | 142 ±2      | 142± 2      | 142± 2        |          |                   |
| Tolvaptan 45 mg          | 141± 1   | 142± 2     | 141± 2      | 142± 2      | 142± 2        |          |                   |
| p (GLM between)          | <0.0001  |            |             |             |               |          |                   |
| p (ANOVA)                | 0.004    | < 0.0001   | < 0.0001    | < 0.0001    | < 0.0001      | < 0.0001 |                   |
| <b>p- osm (mosm/kg)</b>  |          |            |             |             |               |          |                   |
| Placebo                  | 285± 4   | 284± 4     | 283± 4      | 283± 5      | 281± 3        | < 0.0001 |                   |
| Tolvaptan 15 mg          | 288± 3   | 289± 3     | 288± 3      | 289± 3      | 288± 4        |          |                   |
| Tolvaptan 30 mg          | 288± 3   | 290± 3     | 290± 3      | 290± 4      | 290± 3        |          |                   |
| Tolvaptan 45 mg          | 288± 3   | 290± 3     | 289± 4      | 290± 4      | 290± 3        |          |                   |
| p (GLM between)          | <0.0001  |            |             |             |               |          |                   |
| p (ANOVA)                | 0.018    | <0.0001    | <0.0001     | <0.0001     | <0.0001       | <0.0001  |                   |
