# Supplementary material for: Effect of tolvaptan on renal water and sodium excretion and blood pressure during nitric oxide inhibition: a dose-response study in healthy subjects
Source: Springer Nature journal article supplement (doi:10.1186/s12882-017-0501-1), 2017-03-13
Supplement: MOESM3 [file 12138872]

| Periods                 | Prior to L-NMMA infusion period | At the end of L-NMMA infusion period | 1 hour after L-NMMA infusion period | P (GLM-within) |
|-------------------------|---------------------------------|--------------------------------------|-------------------------------------|----------------|
| <b>PRC(pg/ml)</b>       |                                 |                                      |                                     |                |
| Placebo                 | 5.8± 1.6                        | 4.4± 1.5                             | 4.1± 1.7                            | 0.633          |
| Tolvaptan 15 mg         | 6.1± 2.1                        | 4.2± 2.1                             | 4.7± 2.0                            |                |
| Tolvaptan 30 mg         | 6.3± 1.8                        | 4.4± 1.7                             | 4.5± 1.9                            |                |
| Tolvaptan 45 mg         | 6.8± 1.8                        | 4.9± 1.6                             | 5.5± 1.5                            |                |
| p (GLM between)         |                                 | 0.838                                |                                     |                |
| <b>P-AngII (pg/ml)</b>  |                                 |                                      |                                     |                |
| Placebo                 | 16.4± 2.3                       | 13.5± 3.0                            | 13.5± 2.9                           | 0.864          |
| Tolvaptan 15 mg         | 16.4± 2.6                       | 12.2± 3.6                            | 13.5± 3.3                           |                |
| Tolvaptan 30 mg         | 13.5± 2.6                       | 11.0± 1.8                            | 11.0± 3.4                           |                |
| Tolvaptan 45 mg         | 18.2± 2.2                       | 14.9 ± 2.6                           | 14.9± 2.7                           |                |
| p (GLM between)         |                                 | 0.854                                |                                     |                |
| <b>P- Aldo (pmol/L)</b> |                                 |                                      |                                     |                |
| Placebo                 | 69± 2                           | 65 ± 2                               | 59± 2                               | 0.568          |
| Tolvaptan 15 mg         | 67± 2                           | 64± 2                                | 67± 2                               |                |
| Tolvaptan 30 mg         | 62± 2                           | 63± 2                                | 62± 2                               |                |
| Tolvaptan 45 mg         | 69± 2                           | 69± 2                                | 69± 2                               |                |
| p (GLM between)         |                                 | 0.999                                |                                     |                |
