# Supplementary material for: Effect of tolvaptan on renal water and sodium excretion and blood pressure during nitric oxide inhibition: a dose-response study in healthy subjects
Source: Springer Nature journal article supplement (doi:10.1186/s12882-017-0501-1), 2017-03-13
Supplement: MOESM4 [file 12138872]

| Periods                 | Baseline                 | L-NMMA                       |                        | Post infusion                           |                                         | p<br>(GLM-within) |
|-------------------------|--------------------------|------------------------------|------------------------|-----------------------------------------|-----------------------------------------|-------------------|
|                         | Prior to L-NMMA infusion | At the beginning of infusion | At the end of infusion | 30 min after the end of L-NMMA infusion | 60 min after the end of L-NMMA infusion |                   |
| <b>SBP (mmHG)</b>       |                          |                              |                        |                                         |                                         |                   |
| Placebo                 | 113± 8                   | 116± 8                       | 116± 8                 | 117± 9                                  | 118±10                                  | 0.179             |
| Tolvaptan 15 mg         | 114± 8                   | 118±8                        | 117± 7                 | 115± 6                                  | 117± 7                                  |                   |
| Tolvaptan 30 mg         | 114± 9                   | 116± 8                       | 116± 8                 | 117± 9                                  | 118± 9                                  |                   |
| Tolvaptan 45 mg         | 114± 10                  | 116± 7                       | 117± 9                 | 117± 8*                                 | 119± 10                                 |                   |
| p (GLM between)         |                          |                              | 0.993                  |                                         |                                         |                   |
| <b>DBP (mmHg)</b>       |                          |                              |                        |                                         |                                         |                   |
| Placebo                 | 62± 5                    | 68± 7*                       | 68± 5                  | 67± 6                                   | 66± 7                                   | 0.691             |
| Tolvaptan 15 mg         | 62± 7                    | 68± 7                        | 67± 8                  | 65± 6                                   | 66± 7                                   |                   |
| Tolvaptan 30 mg         | 62± 6                    | 68± 6                        | 68± 7                  | 67± 6                                   | 66± 6                                   |                   |
| Tolvaptan 45 mg         | 61± 6                    | 68± 6                        | 68± 7                  | 66± 8                                   | 67± 8                                   |                   |
| p (GLM between)         |                          |                              | 0.997                  |                                         |                                         |                   |
| <b>Pulse rate (BPM)</b> |                          |                              |                        |                                         |                                         |                   |
| Placebo                 | 57±9                     | 52±10                        | 53 ±8                  | 56± 9                                   | 59 ±10                                  | 0.149             |
| Tolvaptan 15 mg         | 58± 9                    | 51±8                         | 51±8                   | 55±7                                    | 58±8                                    |                   |
| Tolvaptan 30 mg         | 58±8                     | 54±8                         | 54±8                   | 57±8                                    | 61±9                                    |                   |
| Tolvaptan 45 mg         | 57± 8                    | 53± 7                        | 53 ± 8                 | 55 ±8                                   | 59± 9                                   |                   |
| p (GLM between)         |                          |                              | 0.906                  |                                         |                                         |                   |
